# Supplementary material for: A data-driven QSPR model for screening organic corrosion inhibitors for carbon steel using machine learning techniques
Source: Royal Society of Chemistry journal article supplement (doi:10.1039/d4ra02159b), 2024-01-01
Supplement: d4ra02159b1.pdf [file d4ra02159b1.pdf]

**Electronic Supplementary Information**

**A data-driven QSPR model for screening organic corrosion inhibitors for carbon steel using machine learning techniques**

Thanh Hai Pham<sup>\*abc</sup>, Phung K. Le<sup>ab</sup>, Do Ngoc Son<sup>\*ab</sup>

<sup>a</sup> *Ho Chi Minh City University of Technology (HCMUT), 268 Ly Thuong Kiet Street, District 10, Ho Chi Minh City, Vietnam.*

<sup>b</sup> *Vietnam National University Ho Chi Minh City, Linh Trung Ward, Ho Chi Minh City, Vietnam.*

<sup>c</sup> *Vietnam Institute for Tropical Technology and Environmental Protection, 57A Truong Quoc Dung Street, Phu Nhuan District, Ho Chi Minh City 70000, Vietnam.*

*\* Corresponding authors. Email addresses: [pthai.sdh21@hcmut.edu.vn](mailto:pthai.sdh21@hcmut.edu.vn) (Thanh Hai Pham); [dnson@hcmut.edu.vn](mailto:dnson@hcmut.edu.vn) (Do Ngoc Son)*

**Table S1.** List of 208 2D descriptors in 2Ddes feature set.

| <b>Groups</b>                | <b>Number of descriptors</b> | <b>Name of descriptors</b>                                                                                                                                                                                                                                                                                                                                                                         |
|------------------------------|------------------------------|----------------------------------------------------------------------------------------------------------------------------------------------------------------------------------------------------------------------------------------------------------------------------------------------------------------------------------------------------------------------------------------------------|
| Partial charge               | 4                            | MaxPartialCharge, MinPartialCharge, MaxAbsPartialCharge, MinAbsPartialCharge                                                                                                                                                                                                                                                                                                                       |
| Molecular property           | 4                            | MolLogP, MolMR, MolWt, ExactMolWt                                                                                                                                                                                                                                                                                                                                                                  |
| Topological and connectivity | 22                           | BalabanJ, BertzCT, HallKierAlpha, lpc, Kappa1, Kappa2, Kappa3, Chi0, Chi1, Chi0n, Chi1n, Chi2n, Chi3n, Chi4n, Chi0v, Chi1v, Chi2v, Chi3v, Chi4v, FpDensityMorgan1, FpDensityMorgan2, FpDensityMorgan3                                                                                                                                                                                              |
| Lipinski                     | 21                           | HeavyAtomCount, HeavyAtomMolWt, NHOHCount, NOCount, NumHAcceptors, NumHDonors, NumHeteroatoms, NumRotatableBonds, NumValenceElectrons, NumRadicalElectrons, NumAromaticRings, NumSaturatedRings, NumAliphaticRings, NumAromaticHeterocycles, NumSaturatedHeterocycles, NumAliphaticHeterocycles, NumAromaticCarbocycles, NumSaturatedCarbocycles, NumAliphaticCarbocycles, RingCount, FractionCSP3 |
| MOE-type                     | 59                           | TPSA, LabuteASA, PEOE_VSA <sub>n</sub> (n=1-14), SMR_VSA <sub>n</sub> (n=1-10), SlogP_VSA <sub>n</sub> (n=1-12), Estate_VSA <sub>n</sub> (n=1-11), VSA_EStaten (n=1-10)                                                                                                                                                                                                                            |
| BCUT2D                       | 8                            | 'BCUT2D_MWHI', 'BCUT2D_MWLOW', 'BCUT2D_CHGHI', 'BCUT2D_CHGLO', 'BCUT2D_LOGPHI', 'BCUT2D_LOGPLOW', 'BCUT2D_MRHI', 'BCUT2D_MRLOW'                                                                                                                                                                                                                                                                    |
| EState                       | 4                            | MaxEStateIndex, MinEStateIndex, MaxAbsEStateIndex, MinAbsEStateIndex                                                                                                                                                                                                                                                                                                                               |
| Constitutional               | 85                           | fr_X (X=Al_COO, Al_OH, ...)                                                                                                                                                                                                                                                                                                                                                                        |
| QED                          | 1                            | qed                                                                                                                                                                                                                                                                                                                                                                                                |

**Table S2.** The optimal values of hyper-parameters for other considered models.

| <b>Model</b>          | <b>n_estimators</b> | <b>min_samples_split</b> | <b>min_samples_leaf</b> | <b>max_depth</b> |
|-----------------------|---------------------|--------------------------|-------------------------|------------------|
| GB/rdkit2ddes_ 5      | 100                 | 4                        | 1                       | 3                |
| GB/rdkit2ddes_ 10     | 400                 | 2                        | 3                       | 5                |
| GB/rdkit2ddes_ 15     | 100                 | 2                        | 5                       | 4                |
| GB/rdkit2ddes_ 20     | 200                 | 2                        | 4                       | 3                |
| GB/rdkit2ddes_ 25     | 100                 | 2                        | 4                       | 5                |
| GB/rdkit2ddes_ 30     | 600                 | 2                        | 4                       | 3                |
| GB/rdkit2ddes_ 35     | 200                 | 2                        | 5                       | 4                |
| GB/rdkit2ddes_ 45     | 600                 | 2                        | 5                       | 3                |
| GB/rdkit2ddes_ 50     | 600                 | 2                        | 5                       | 4                |
| GB/rdkit2ddes_ 55     | 600                 | 2                        | 5                       | 3                |
| GB/rdkit2ddes_ 60     | 200                 | 2                        | 4                       | 5                |
| GB/rdkit2ddes_ 65     | 600                 | 2                        | 5                       | 4                |
| GB/rdkit2ddes_ 70     | 600                 | 2                        | 4                       | 3                |
| GB/rdkit2ddes_ 80     | 600                 | 2                        | 4                       | 3                |
| GB/rdkit2ddes_ 90     | 400                 | 2                        | 4                       | 3                |
| GB/rdkit2ddes_<br>100 | 600                 | 2                        | 5                       | 4                |
| GB/rdkit2ddes_<br>110 | 600                 | 2                        | 5                       | 3                |
| GB/rdkit2ddes_<br>120 | 600                 | 2                        | 5                       | 4                |
| GB/rdkit2ddes_<br>130 | 600                 | 2                        | 5                       | 4                |

**Table S3.** Comparison of the characteristics and predictive performance of models on published datasets.

| Dataset                                          | Model      | Input features                                | Validation method | RMSE (%) | Ref.                       |
|--------------------------------------------------|------------|-----------------------------------------------|-------------------|----------|----------------------------|
| PQ-41<br>(41 pyridines and quinolines)           | GA-NN      | Molecular descriptors and adsorption energies | 5-fold CV         | 16.74    | Ser et al. <sup>1</sup>    |
|                                                  | GB/2Ddes   | 208 2D descriptors                            | 5-fold CV         | 19.67    | This work                  |
|                                                  | GB/2Ddes10 | Top 10 2D descriptors                         | 5-fold CV         | 14.44    | This work                  |
| P-20<br>(20 pyridazines)                         | NN         | 5 selected descriptors                        | 5-fold CV         | 14.69    | Quadri et al. <sup>2</sup> |
|                                                  | GB/2Ddes   | 208 2D descriptors                            | 5-fold CV         | 9.80     | This work                  |
|                                                  | GB/2Ddes5  | Top 5 2D descriptors                          | 5-fold CV         | 8.89     | This work                  |
| IL-30<br>(30 ionic liquids)                      | NN         | 5 selected descriptors                        | 5-fold CV         | 10.01    | Quadri et al. <sup>3</sup> |
|                                                  | GB/2Ddes   | 208 2D descriptors                            | 5-fold CV         | 6.92     | This work                  |
|                                                  | GB/2Ddes10 | Top 10 2D descriptors                         | 5-fold CV         | 6.08     | This work                  |
| CO-270<br>(270 cross-category organic compounds) | 3L-DMPNN   | Atomic, bond, and molecular descriptors       | 10-fold CV        | 7.82     | Dai et al. <sup>4</sup>    |
|                                                  | GB/2Ddes   | 208 2D descriptors                            | 10-fold CV        | 6.72     | This work                  |
|                                                  | GB/2Ddes50 | Top 50 2D descriptors                         | 10-fold CV        | 6.15     | This work                  |

**Table S4.** Comparison of predicted IE with the published experimental values for ten drug compounds.

| ID | Medicine name               | Structure                                                                           | Exp. condition*               | Exp. IE (%) | Pre. IE (%) |
|----|-----------------------------|-------------------------------------------------------------------------------------|-------------------------------|-------------|-------------|
| T1 | Atenolol <sup>5</sup>       | 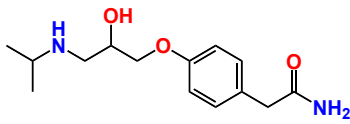   | HCl 1 M,<br>0.94 mM,<br>EIS   | 90.9        | 91.4        |
| T2 | Tinidazole <sup>6</sup>     |    | HCl 1 M,<br>1.21 mM,<br>EIS   | 87.8        | 92.4        |
| T3 | Cimetidine <sup>7</sup>     |   | HCl 1 M,<br>0.79 mM,<br>EIS   | 95.5        | 91.2        |
| T4 | Pheniramine <sup>8</sup>    |  | HCl 0,5 M,<br>0.83 mM,<br>EIS | 86.4        | 86.5        |
| T5 | Ethambutol <sup>9</sup>     |  | HCl 2 M,<br>0,98 mM,<br>EIS   | 86.4        | 82.9        |
| T6 | Acetazolamide <sup>10</sup> |  | HCl 1 M,<br>0.90 mM,<br>EIS   | 88.8        | 85.3        |

|     |                              |                                                                                    |                               |      |      |
|-----|------------------------------|------------------------------------------------------------------------------------|-------------------------------|------|------|
| T7  | Moxifloxacin <sup>11</sup>   | 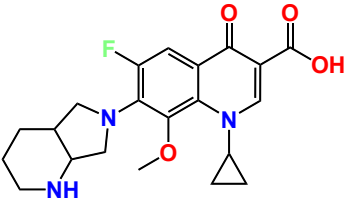  | HCl 1 M,<br>0.75 mM,<br>EIS   | 92.0 | 87.5 |
| T8  | Cefadroxil <sup>12</sup>     |   | HCl 1 M,<br>1.00 mM,<br>Tafel | 84.1 | 84.0 |
| T9  | Ranitidine <sup>13</sup>     |   | HCl 1M,<br>1.27 mM,<br>EIS    | 92.0 | 93.0 |
| T10 | Metoclopramide <sup>14</sup> |  | HCl 1 M,<br>1.00 mM,<br>EIS   | 94.0 | 94.1 |

\*The experimental conditions include solution, inhibitor concentration, and method for determining IE, respectively.

**Table S5.** Predicted IEs of the top 5 drug compounds with the highest predicted IEs

| ID | Medicine name | Molecular structure                                                                                                                                                                                                                                                                                                                                                      | Predicted IE (%) |
|----|---------------|--------------------------------------------------------------------------------------------------------------------------------------------------------------------------------------------------------------------------------------------------------------------------------------------------------------------------------------------------------------------------|------------------|
| B1 | Dasatinib     | 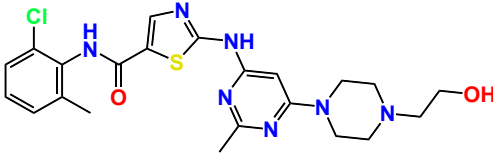<br>The structure of Dasatinib features a central pyrimidopyrimidine core. It is substituted with a 2-chlorophenyl group, a 2-hydroxyethylpiperazine ring, and a thiazole ring. A sulfonamide group is also present, with the nitrogen atom highlighted in blue.                       | 98.5             |
| B2 | Tucatinib     | <br>The structure of Tucatinib consists of a central pyrimidopyrimidine core. It is substituted with a 2,2-dimethylpyrrolidine ring, a 4-methyl-2,3-dihydro-1H-benzotriazol-5-yl group, and a 4-methylphenyl group. The nitrogen atom in the pyrrolidine ring is highlighted in blue.  | 98.0             |
| B3 | Pazopanib     | <br>The structure of Pazopanib features a central pyrimidopyrimidine core. It is substituted with a 4-methylphenyl group, a 4-methyl-1H-imidazole ring, and a sulfonamide group. The nitrogen atom in the imidazole ring is highlighted in blue.                                       | 97.5             |
| B4 | Benzthiazide  | <br>The structure of Benzthiazide consists of a central benzothiazide core. It is substituted with a 4-chlorophenyl group, a sulfonamide group, and a benzyl group. The chlorine atom and the nitrogen atom in the sulfonamide group are highlighted in green and blue, respectively. | 97.4             |
| B5 | Zotepine      | <br>The structure of Zotepine features a central benzothiazine core. It is substituted with a 4-chlorophenyl group and a 2-(dimethylamino)ethoxy group. The chlorine atom is highlighted in green.                                                                                    | 97.3             |

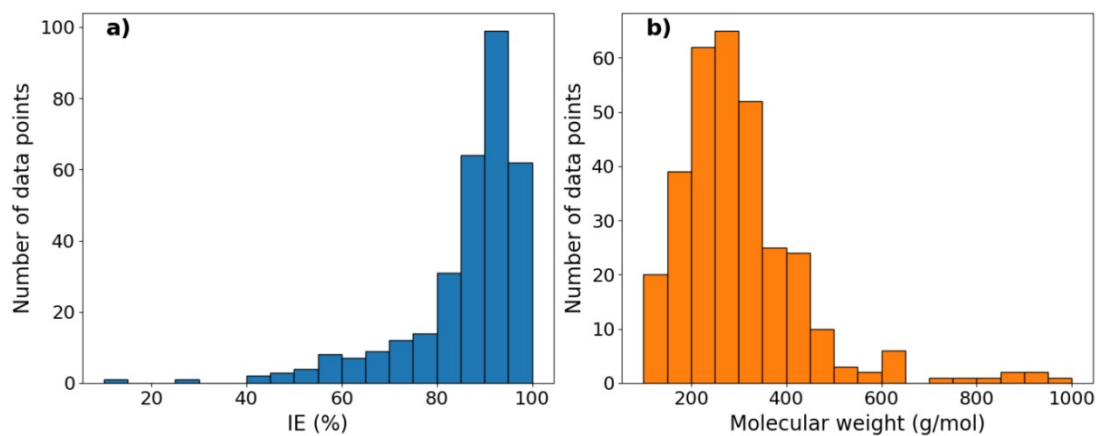

**Figure S1.** Distributions of the (a) IE values and (b) molecular weights of corrosion inhibitors in the Fe-HCl-317 dataset.



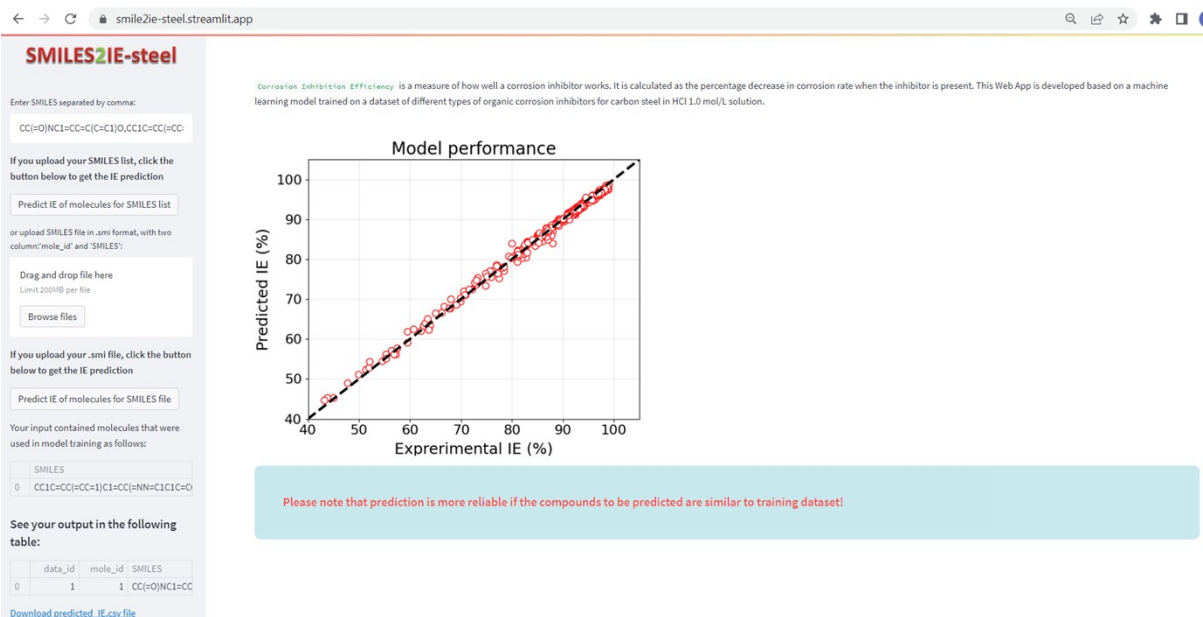

**Figure S2.** The interface of SMILES2IE-steel web tool

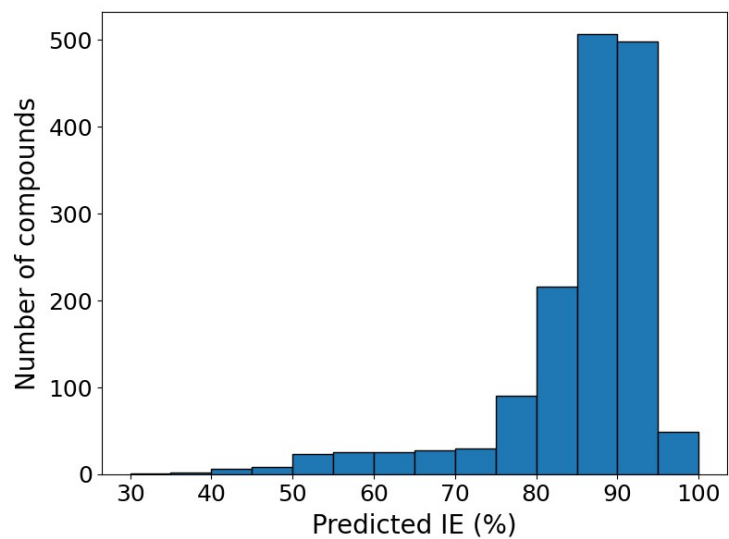

**Figure S3.** Distribution of number of compounds according to the predicted IE

## REFERENCES

- 1 C. T. Ser, P. Žuvela and M. W. Wong, *Appl. Surf. Sci.*, 2020, **512**, 145612.
- 2 T. W. Quadri, L. O. Olasunkanmi, E. D. Akpan, O. E. Fayemi, H.-S. Lee, H. Lgaz, C. Verma, L. Guo, S. Kaya and E. E. Ebenso, *Mater. Today Commun.*, 2022, **30**, 103163.
- 3 T. W. Quadri, L. O. Olasunkanmi, O. E. Fayemi, E. D. Akpan, H.-S. Lee, H. Lgaz, C. Verma, L. Guo, S. Kaya and E. E. Ebenso, *Comput. Mater. Sci.*, 2022, **214**, 111753.
- 4 J. Dai, D. Fu, G. Song, L. Ma, X. Guo, A. Mol, I. Cole and D. Zhang, *Corros. Sci.*, 2022, **209**, 110780.
- 5 G. Karthik and M. Sundaravadivelu, *Egypt. J. Pet.*, 2016, **25**, 183–191.
- 6 I. Reza, A. Saleemi and S. Naveed, *PJCT*, 2011, **13**, 67–71.
- 7 A. Singh, A. Gupta, A. K. Rawat, K. R. Ansari, M. A. Quraishi and E. E. Ebenso, *Int. J. Electrochem. Sci.*, 2014, **9**, 7614–7628.
- 8 I. Ahamad, R. Prasad and M. A. Quraishi, *Corros. Sci.*, 2010, **52**, 3033–3041.
- 9 S. Dahiya, N. Saini, N. Dahiya, H. Lgaz, R. Salghi, S. Jodeh and S. Lata, *Port. Electrochim. Acta*, 2018, **36**, 213–230.
- 10 L. P. Chaudhari and S. N. Patel, *J. Bio- Tribo-Corrosion*, 2019, **5**, 20.
- 11 A. S. Fouda, K. Shalabi and A. E-Hossiany, *J. Bio- Tribo-Corrosion*, 2016, **2**, 18.
- 12 S. K. Shukla and M. A. Quraishi, *Mater. Chem. Phys.*, 2010, **120**, 142–147.
- 13 R. S. A. Hameed, *Port. Electrochim. Acta*, 2011, **29**, 273–285.
- 14 Z. Golshani, S. M. A. Hosseini, M. Shahidizandi and M. J. Bahrami, *Mater. Corros.*, 2019, **70**, 1862–1871.
